# Supplementary material for: In situ growth and bioerosion rates of Lophelia pertusa in a Norwegian fjord and open shelf cold-water coral habitat
Source: PeerJ. 2019 Sep 24;7:e7586. doi: 10.7717/peerj.7586 (PMC6764366; doi:10.7717/peerj.7586)
Supplement: Supplemental Information 1 — Each data point indicates the average performance of live L. pertusa with regard to net calcification, linear extension and mortality over 1 year deployment in the natural environment (Table 1). Dead coral fragments are listed with regard to their bioerosion and accretion rates over the 1 year in situ experiment (Table 2). For both sample types, buoyant and dry weight at the end of the experiment as well as area and volume of the individual replicates are presented (Tables 1 and 2). From these parameters, the conversion different factors (Table 5) are calculated. [file peerj-07-7586-s001.xlsx]

## Sheet: Live corals
Location	Sample code	Species	Polyp number	Buoyant weight end [g]	Dry weight end [g]	Surface Stats Area [mm2]	Volume [mm3]	Calcification rate G [% d-1]	Calcification rate [g m-2 yr-1]	Average linear extension [mm d-1]	Average linear extension [mm yr-1]	Mortality rates [%]
Leksa (on-reef)	A1R	Lophelia pertusa	88	18.4603	28.3288	25828.7	15364.4	0.00192704	16.7662	0.0027622	1.0082	31.8182
Leksa (on-reef)	A2R	Lophelia pertusa	86	23.3107	35.7188	25800.9	18097.9	0.048547	215.324	0.0110865	4.04659	3.48837
Leksa (on-reef)	A3R	Lophelia pertusa	85	16.7561	25.6235	21316.4	13652.4	0.0112765	53.139	0.00576016	2.10246	9.41176
Leksa (on-reef)	A4R	Lophelia pertusa	106	50.6779	78.0946	47312.8	37487.3	0.0190196	112.021	0.00717024	2.61714	2.83019
Leksa (on-reef)	A1W	Lophelia pertusa	201	47.2903	71.4241	50538	35578.7	0.00070493	4.74811	0.00432927	1.58018	40.2985
Leksa (on-reef)	A2W	Lophelia pertusa	122	36.6698	56.3997	49790.2	29353.7	0.0189156	76.3847	0.00717609	2.61927	35.2459
Leksa (on-reef)	A3W	Lophelia pertusa	71	51.2769	79.5982	50243	37793.3	0.00682313	41.2133	0.00392073	1.43107	85.9155
Leksa (on-reef)	A4W	Lophelia pertusa	108	57.8884	89.0999	53725	42886.5	0.0171125	101.914	0.00631707	2.30573	30.5556
Leksa (off-reef)	B1R	Lophelia pertusa
Leksa (off-reef)	B2R	Lophelia pertusa	196	62.4949	96.3338	63480	47259.6	0.0239503	125.845	0.00749247	2.73475	7.14286
Leksa (off-reef)	B3R	Lophelia pertusa	177	48.5453	74.785	60327	38086	0.00733464	35.078	0.00568793	2.07609	16.9492
Leksa (off-reef)	B4R	Lophelia pertusa	89	14.8272	22.6595	21601.4	12636.9	0.0181975	69.465	0.00638974	2.33226	2.24719
Leksa (off-reef)	B1W	Lophelia pertusa
Leksa (off-reef)	B2W	Lophelia pertusa	97	38.6365	59.6107	43410.9	29863.7	0.00877981	47.0071	0.0106181	3.87562	46.3918
Leksa (off-reef)	B3W	Lophelia pertusa	88	42.2157	64.7663	36318.1	30761.4	0.0186394	118.653	0.00557747	2.03578	11.3636
Leksa (off-reef)	B4W	Lophelia pertusa	149	59.3682	91.6228	53859	43941.6	0.00846176	56.3826	0.0056153	2.04958	42.2819
Sula (off-reef)	C1R	Lophelia pertusa	39	11.4426	17.5889	15225.2	9334.72	0.00665495	30.1644	0.00421074	1.53692	0
Sula (off-reef)	C2R	Lophelia pertusa	41	21.2186	32.6932	21924	16207.2	0.00837625	46.3798			9.7561
Sula (off-reef)	C3R	Lophelia pertusa	15	9.03463	13.8421	9393.2	6933.98	0.00480658	27.8105			0
Sula (off-reef)	C4R	Lophelia pertusa	36	14.6146	22.5112	17710.5	11732.3	0.00156178	9.67474			2.77778
Sula (off-reef)	C1W	Lophelia pertusa	30	8.87463	13.5662	13046.5	7299.06	0.0122509	46.828			3.33333
Sula (off-reef)	C2W	Lophelia pertusa	29	14.2706	22.0644	15187.4	11003.9	0.00661684	35.8805	0.00272837	0.995853	41.3793
Sula (off-reef)	C3W	Lophelia pertusa	41	19.7496	30.2228	26968.3	16157.8	0.0118994	49.7348	0.00403606	1.47316	9.7561
Sula (off-reef)	C4W	Lophelia pertusa	51	23.5366	36.1367	26091.6	18758.2	0.00706587	37.5182	0.00336538	1.22837	15.6863

## Sheet: Bioeroded fragments
Location	Sample code	Species	Buoyant weight end [g]	Dry weight end [g]	Surface Stats Area [mm2]	Volume [mm3]	Bioerosion rate G [% d-1]	Bioerosion rate [g m-2 yr-1]	Accretion rate G [% d-1]	Accretion rate [g m-2 yr-1]
Leksa (on-reef)	A1	Lophelia pertusa framework	224.581	216.133	176644	151984	-0.00506187	-34.3913	0.0029	19.7307
Leksa (on-reef)	A2	Lophelia pertusa framework	195.852	165.15	156556	128656	-0.00297448	-18.8789	0.0068	43.3704
Leksa (on-reef)	A3	Lophelia pertusa framework	198.447	179.068	181609	137994	-0.00265774	-15.1079	0.0033	18.5981
Leksa (on-reef)	A4	Lophelia pertusa framework	233.35	221.491	190268	160191	-0.00346297	-22.1826	0.0047	30.1461
Leksa (on-reef)	A5	Lophelia pertusa framework	189.535	162.006	165564	130627	-0.00524457	-31.2782	0.0049	28.9661
Leksa (on-reef)	A6	Lophelia pertusa framework	227.866	221.089	166277	154688	-0.00241924	-17.3844	0.0026	18.6479
Leksa (off-reef)	B1	Lophelia pertusa framework	209.892	193.473	172872	143581	-0.000475609	-2.98169	0.0022	13.5283
Leksa (off-reef)	B2	Lophelia pertusa framework	174.451	141.706	148195	118038	-0.00108825	-6.49984	0.003	18.0758
Leksa (off-reef)	B3	Lophelia pertusa framework	231.645	226.909	172867	154004	-0.000481039	-3.36287	0.0028	19.8322
Leksa (off-reef)	B4	Lophelia pertusa framework	220.311	209.523	181253	151140	-0.000142937	-0.520631	0.003	18.7771
Leksa (off-reef)	B5	Lophelia pertusa framework	197.429	175.503	165893	136176	-0.00161953	-9.90633	0.0024	14.7307
Leksa (off-reef)	B6	Lophelia pertusa framework	219.292	211.003	173246	147137	-0.0018135	-12.0295	0.0027	17.8104
Sula (off-reef)	C1	Lophelia pertusa framework	174.286	140.489	147484	115989	-0.00191068	-11.6318	0.0016	9.61568
Sula (off-reef)	C2	Lophelia pertusa framework	173.394	142.69	145294	117808	-0.0012254	-7.56095	0.0027	16.3902
Sula (off-reef)	C3	Lophelia pertusa framework	141.68	93.4765	113808	90799.7	-0.00134735	-8.38554	0.0014	8.91746
Sula (off-reef)	C4	Lophelia pertusa framework	168.37	130.581	136133	110818	-0.00142705	-8.98529	0.002	12.8371
Sula (off-reef)	C5	Lophelia pertusa framework	180.474	150.413	158625	121809	-0.00110668	-6.53266	0.0025	14.6929
Sula (off-reef)	C6	Lophelia pertusa framework	157.998	119.887	147081	107070	-0.000929785	-5.10852	0.0014	7.96541
coral material is
a mix of Sula as
well as Nordleksa
fragments!!
